# Supplementary material for: Staphylococcal Enterotoxin A Induces Intestinal Barrier Dysfunction and Activates NLRP3 Inflammasome via NF-κB/MAPK Signaling Pathways in Mice
Source: MDPI journal article supplement (doi:10.3390/toxins14010029), 2022-01-01
Supplement: s1 [file s1]

# Supplementary Materials: Staphylococcal enterotoxin A induces intestinal barrier dysfunction and activates NLRP3 inflammasome via NF- $\kappa$ B/MAPK signaling pathways in mice

Chunmei Liu, Kunmei Chi, Meng Yang and Na Guo\*

**Table S1.** The primary antibodies used in this study.

| Antibody                                                 | Company                                 | Catalog number | Dilutions of Western blot |
|----------------------------------------------------------|-----------------------------------------|----------------|---------------------------|
| Staphylococcal Enterotoxin A (SEA)                       | Sigma-Aldrich (St Louis, MO, USA)       | S7656          | 1:20000                   |
| ZO-1                                                     | Affinity Biosciences (Jiangsu, China)   | AF5145         | 1:1000                    |
| Occludin                                                 | Proteintech (Wuhan, China)              | 27260-1-AP     | 1:4000                    |
| NLRP3                                                    | Affinity Biosciences                    | DF7438         | 1:1000                    |
| Caspase-1/P20/P10                                        | Proteintech                             | 22915-1-AP     | 1:1000                    |
| ASC                                                      | Cell Signaling Technology (Boston, USA) | 13833S         | 1:1000                    |
| ASC                                                      | Santa Cruz (Dallas, Texas, USA)         | sc-22514-R     | 1:200                     |
| Cleaved-IL-1 $\beta$                                     | Affinity Biosciences                    | AF4006         | 1:1000                    |
| p38 MAPK (D13E1)                                         | Cell Signaling Technology               | 8690T          | 1:1000                    |
| Phospho-p38 MAPK (Thr180/Tyr182) (D3F9)                  | Cell Signaling Technology               | 4511T          | 1:1000                    |
| p44/42 MAPK (Erk1/2) (137F5)                             | Cell Signaling Technology               | 4695T          | 1:1000                    |
| Phospho-p44/42 MAPK (Erk1/2) (Thr202/Tyr204) (D13.14.4E) | Cell Signaling Technology               | 4370T          | 1:1000                    |
| JNK                                                      | Cell Signaling Technology               | 9252T          | 1:1000                    |
| Phospho-SAPK/JNK (Thr183/Tyr185) (81E11)                 | Cell Signaling Technology               | 4668T          | 1:1000                    |
| NF- $\kappa$ B P65                                       | Proteintech                             | 10745-1-AP     | 1:1000                    |
| Anti-phospho-NF-kappaB p65 (pSer311)                     | Sigma-Aldrich (St Louis, MO, USA)       | SAB450448<br>2 | 1:1000                    |
| Lamin B1                                                 | Beyotime (Shanghai, China)              | AF1408         | 1:1000                    |
| GAPDH                                                    | Proteintech                             | 60004-1-Ig     | 1:20000                   |

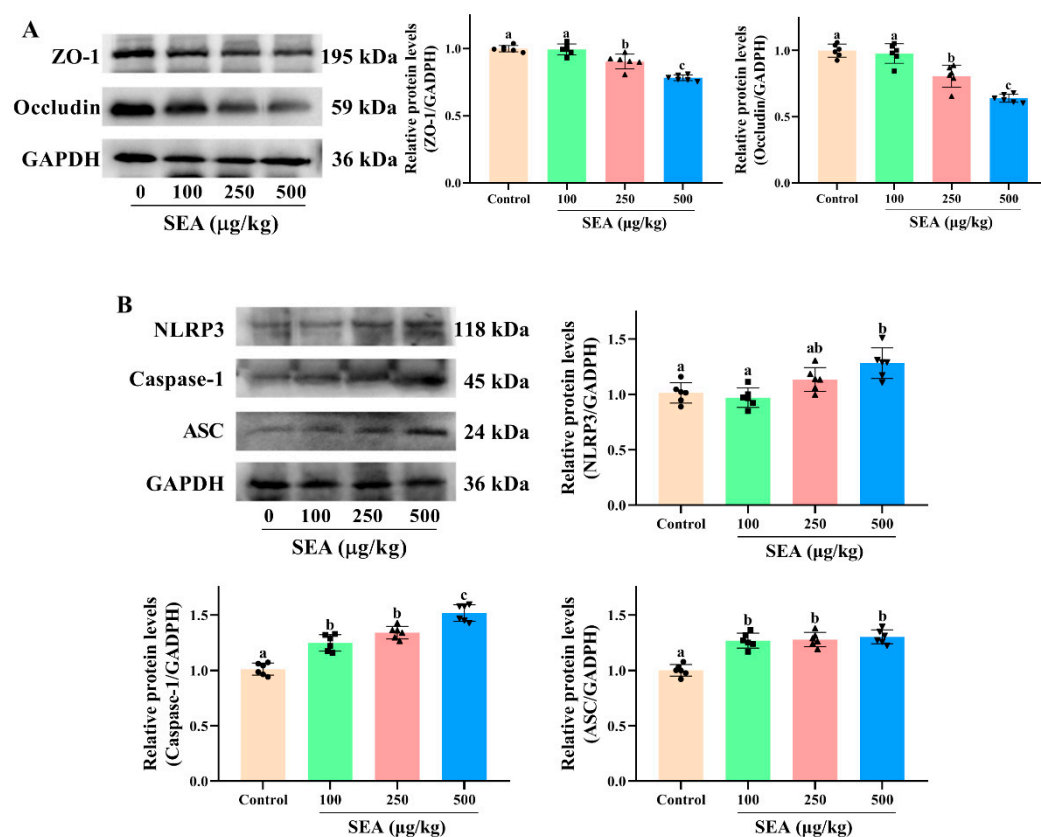

**Figure S1.** Western blot results of duodenum tissues of SEA-exposed mice. (A) Relative protein expression of ZO-1 and Occludin. (B) Relative protein expression of NLRP3, Caspase-1 and ASC. All data were expressed as mean  $\pm$  SD ( $n = 6$ ). Different lowercase letters showed significant difference between different groups,  $p < 0.05$ .

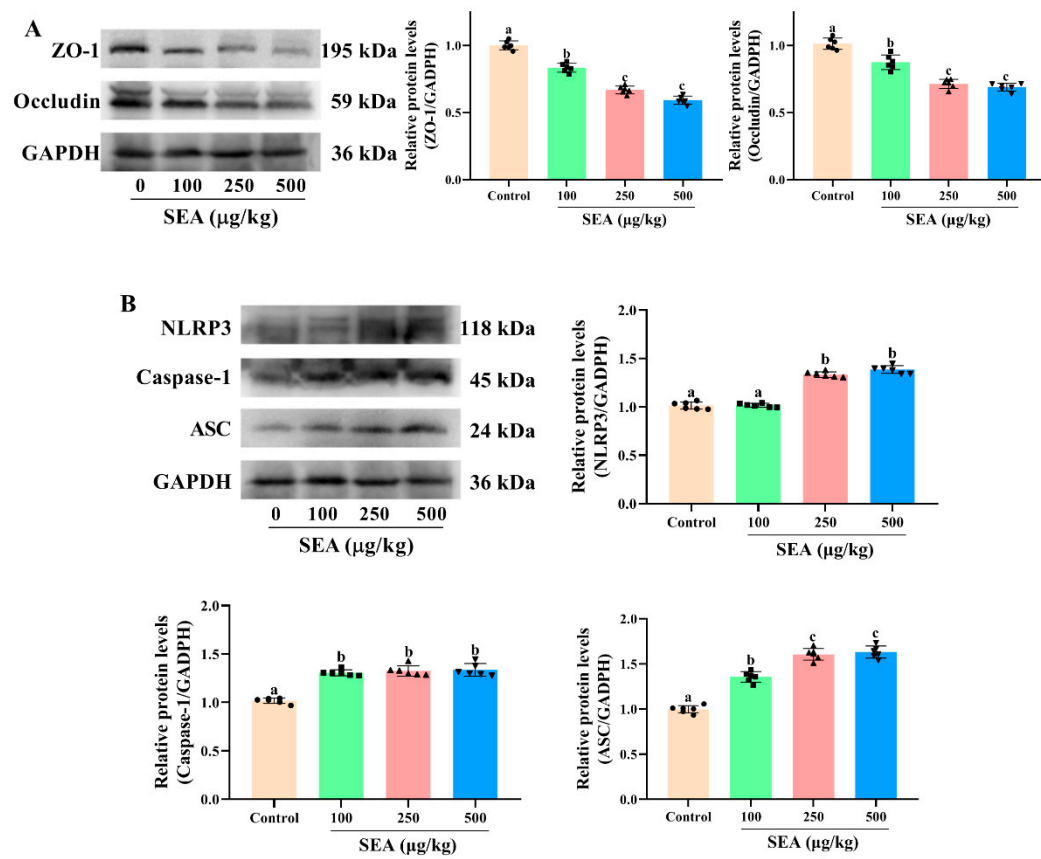

**Figure S2.** Western blot results of ileum tissues of SEA-exposed mice. (A) Relative protein expression of ZO-1 and Occludin. (B) Relative protein expression of NLRP3, Caspase-1 and ASC. All data were expressed as mean  $\pm$  SD ( $n = 6$ ). Different lowercase letters showed significant difference between different groups,  $p < 0.05$ .
